# Supplementary material for: Dinoflagellate Gene Structure and Intron Splice Sites in a Genomic Tandem Array
Source: PubMed Central journal article supplement — J Eukaryot Microbiol. 2015 Jun 8;62(5):679–87. doi: 10.1111/jeu.12230 (PMC5032977; doi:10.1111/jeu.12230), 2015-06-08

## SUPPORTING INFORMATION

### Dinoflagellate Gene Structure and Intron Splice Sites in a Genomic Tandem Array by

Gregory S. Mendez<sup>a</sup>, Charles F. Delwiche<sup>a,b</sup>, Kirk E. Apt<sup>c\*</sup>, J. Casey Lippmeier<sup>c</sup>

**Figure S1.** Alignments and mean pairwise identity graphs for the intergenic spacers between alcohol dehydrogenase (ADH) members and the nine introns of the five members of ADH. Length and pairwise identity is displayed to the right of each alignment. Gene sequences are indicated by black bars, and indels are indicated by intervening black lines. Each column of the alignment has a bar graph above it indicating the mean pairwise identity of all pairs in the alignment. The height of each bar in the graph is proportional to the mean pairwise identity of all pairs in that column and the color of the bar green at 100%, yellow between 30 and less than 100%, and red when less than 30%.

Intergenic

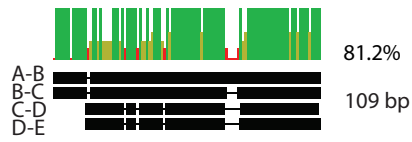

Intron 1

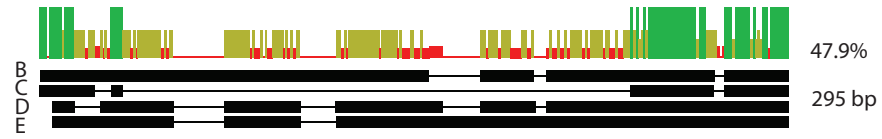

Intron 2

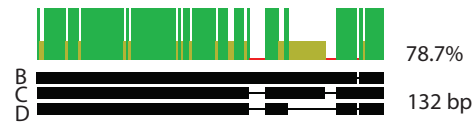

Intron 3

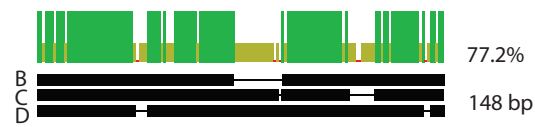

Intron 4

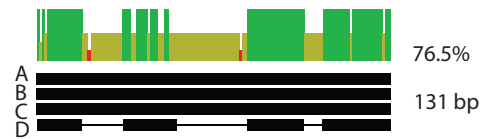

Intron 5

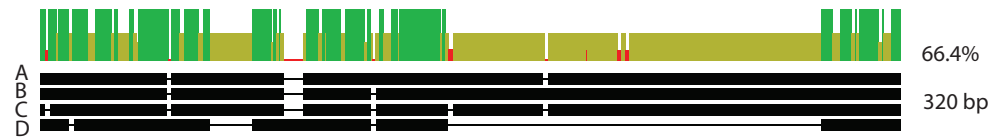

Intron 6

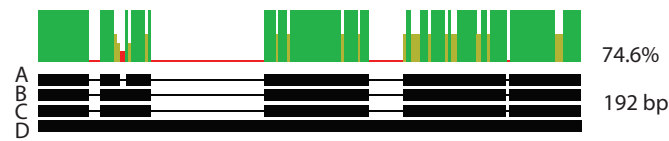

Intron 7

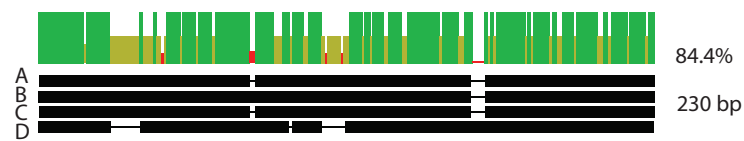

Intron 8

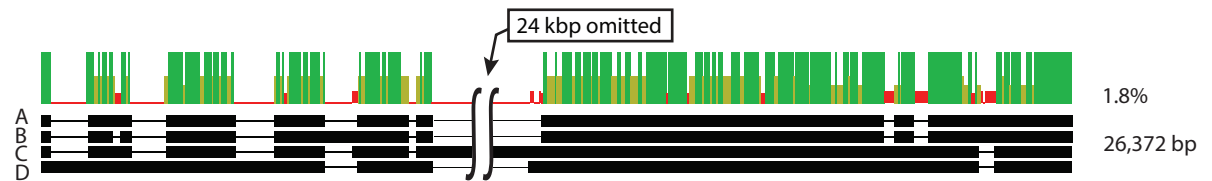

Intron 9

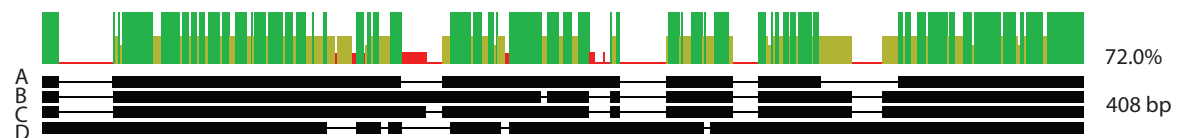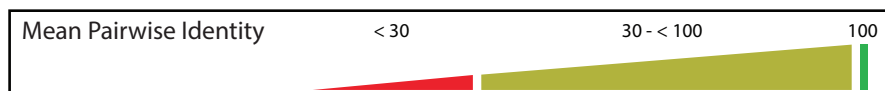

Supplement: JEU-62-679-s001.pdf [file JEU-62-679-s001.pdf]
